# Supplementary material for: Influence of Atmospheric Conditions on Mechanical Properties of Polyamide with Different Content of Recycled Material in Selective Laser Sintering
Source: MDPI journal article supplement (doi:10.3390/polym14122355), 2022-06-10
Supplement: s1 [file s1]

## Supplementary Materials:

**Table S1.** Tensile properties of original material.

| No.                         | $h$ , mm | $b$ , mm | $A_0$ , mm <sup>2</sup> | $F_m$ , N | $R_m$ , MPa | $\varepsilon_p$ , % | $R_p$ , MPa | $E$ , GPa |
|-----------------------------|----------|----------|-------------------------|-----------|-------------|---------------------|-------------|-----------|
| Before exposure             |          |          |                         |           |             |                     |             |           |
| 1Lxy 1                      | 4.20     | 10.03    | 42.13                   | 2077.7    | 49.32       | 26.50               | 46.17       | 2.026     |
| 1Lxy 2                      | 4.18     | 10.02    | 41.88                   | 2030.5    | 48.48       | 26.34               | 45.04       | 2.032     |
| 1Lxy 3                      | 4.16     | 10.00    | 41.60                   | 2038.4    | 49.00       | 35.78               | 45.62       | 2.018     |
| $\bar{x}$                   | 4.18     | 10.02    | 41.87                   | 2048.9    | 48.93       | 29.54               | 45.61       | 2.025     |
| S                           | 0.020    | 0.015    | 0.263                   | 25.249    | 0.424       | 5.405               | 0.565       | 0.007     |
| 1Pxy 1                      | 4.02     | 10.20    | 41.00                   | 2009.2    | 49.00       | 27.92               | 43.92       | 1.845     |
| 1Pxy 2                      | 4.00     | 10.28    | 41.12                   | 2016.9    | 49.05       | 29.58               | 45.19       | 1.964     |
| 1Pxy 3                      | 4.01     | 10.22    | 40.98                   | 2004.8    | 48.92       | 25.27               | 46.83       | 1.909     |
| $\bar{x}$                   | 4.01     | 10.23    | 41.04                   | 2010.3    | 48.99       | 27.59               | 45.31       | 1.906     |
| S                           | 0.010    | 0.042    | 0.074                   | 6.122     | 0.066       | 2.174               | 1.459       | 0.060     |
| 1Pz 1                       | 3.98     | 10.02    | 39.88                   | 1915.8    | 48.04       | 10.77               | 47.84       | 2.006     |
| 1Pz 2                       | 3.98     | 9.99     | 39.76                   | 1946.3    | 48.95       | 12.69               | 48.78       | 2.040     |
| 1Pz 3                       | 4.07     | 10.09    | 41.07                   | 1942.8    | 47.31       | 10.43               | 47.17       | 1.932     |
| $\bar{x}$                   | 4.01     | 10.03    | 40.24                   | 1935.0    | 48.10       | 11.30               | 47.93       | 1.993     |
| S                           | 0.052    | 0.051    | 0.722                   | 16.680    | 0.822       | 1.219               | 0.809       | 0.055     |
| Ageing in UV chamber 500 h  |          |          |                         |           |             |                     |             |           |
| 1Lxy 1                      | 4.17     | 9.92     | 41.37                   | 2075.4    | 50.17       | 20.52               | 46.41       | 1.736     |
| 1Lxy 2                      | 4.14     | 10.02    | 41.48                   | 2023.5    | 48.78       | 21.68               | 47.26       | 1.857     |
| 1Lxy 3                      | 4.17     | 9.96     | 41.53                   | 2063.0    | 49.67       | 18.90               | 48.04       | 2.095     |
| $\bar{x}$                   | 4.16     | 9.97     | 41.46                   | 2053.9    | 49.54       | 20.37               | 47.24       | 1.896     |
| S                           | 0.017    | 0.050    | 0.086                   | 27.060    | 0.704       | 1.396               | 0.815       | 0.183     |
| 1Pxy 1                      | 4.03     | 10.34    | 41.67                   | 1993.1    | 47.83       | 24.28               | 43.13       | 1.728     |
| 1Pxy 2                      | 4.02     | 10.29    | 41.37                   | 1983.1    | 47.94       | 23.97               | 45.16       | 1.637     |
| 1Pxy 3                      | 3.99     | 10.20    | 40.70                   | 2007.6    | 49.33       | 24.15               | 44.80       | 1.831     |
| $\bar{x}$                   | 4.01     | 10.28    | 41.24                   | 1994.6    | 48.37       | 24.13               | 44.36       | 1.732     |
| S                           | 0.021    | 0.071    | 0.497                   | 12.348    | 0.836       | 0.156               | 1.083       | 0.097     |
| 1Pz 1                       | 4.06     | 10.07    | 40.88                   | 1887.2    | 46.16       | 11.85               | 45.83       | 1.599     |
| 1Pz 2                       | 4.08     | 10.10    | 41.21                   | 1891.9    | 45.91       | 11.13               | 45.55       | 1.665     |
| 1Pz 3                       | 4.06     | 10.13    | 41.13                   | 1913.3    | 46.52       | 13.08               | 46.27       | 1.754     |
| $\bar{x}$                   | 4.07     | 10.10    | 41.07                   | 1897.4    | 46.20       | 12.02               | 45.88       | 1.673     |
| S                           | 0.012    | 0.030    | 0.169                   | 13.895    | 0.307       | 0.986               | 0.363       | 0.078     |
| Ageing in UV chamber 1000 h |          |          |                         |           |             |                     |             |           |
| 1Lxy 1                      | 4.19     | 10.07    | 42.19                   | 1911.8    | 45.31       | 10.44               | 44.72       | 2.262     |
| 1Lxy 2                      | 4.20     | 9.95     | 41.79                   | 1947.8    | 46.61       | 13.58               | 45.77       | 1.695     |
| 1Lxy 3                      | 4.20     | 9.96     | 41.83                   | 1495.5    | 35.75       | 4.04                | 35.75       | 1.938     |
| $\bar{x}$                   | 4.20     | 9.99     | 41.94                   | 1785.0    | 42.56       | 9.35                | 42.08       | 1.965     |
| S                           | 0.006    | 0.067    | 0.222                   | 251.397   | 5.930       | 4.862               | 5.507       | 0.284     |
| 1Pxy 1                      | 3.99     | 10.27    | 40.98                   | 1856.7    | 45.31       | 12.01               | 44.82       | 1.815     |
| 1Pxy 2                      | 3.98     | 10.26    | 40.83                   | 1336.1    | 32.72       | 2.46                | 32.72       | 1.657     |
| 1Pxy 3                      | 4.00     | 10.30    | 41.20                   | 1469.6    | 35.67       | 2.88                | 35.67       | 1.777     |
| $\bar{x}$                   | 3.99     | 10.28    | 41.00                   | 1554.1    | 37.90       | 5.78                | 37.74       | 1.750     |
| S                           | 0.010    | 0.021    | 0.184                   | 270.382   | 6.585       | 5.396               | 6.309       | 0.082     |
| 1Pz 1                       | 4.00     | 10.05    | 40.20                   | 1755.5    | 43.67       | 7.70                | 43.50       | 1.849     |
| 1Pz 2                       | 4.01     | 10.02    | 40.18                   | 1729.8    | 43.05       | 6.85                | 42.93       | 2.183     |
| 1Pz 3                       | 4.03     | 10.05    | 40.50                   | 1752.1    | 43.26       | 10.83               | 42.82       | 1.953     |

|                |       |       |       |        |       |       |       |       |
|----------------|-------|-------|-------|--------|-------|-------|-------|-------|
| $\bar{x}$      | 4.01  | 10.04 | 40.29 | 1745.8 | 43.33 | 8.46  | 43.08 | 1.995 |
| S              | 0.015 | 0.017 | 0.180 | 13.995 | 0.315 | 2.095 | 0.365 | 0.171 |
| Natural ageing |       |       |       |        |       |       |       |       |
| 1Lxy 1         | 4.16  | 10.05 | 41.81 | 1877.0 | 44.90 | 16.67 | 43.83 | 1.203 |
| 1Lxy 2         | 4.17  | 10.00 | 41.70 | 1832.6 | 43.95 | 16.23 | 43.55 | 1.225 |
| 1Lxy 3         | 4.13  | 10.02 | 41.38 | 1898.3 | 45.87 | 16.78 | 43.12 | 1.198 |
| $\bar{x}$      | 4.15  | 10.02 | 41.63 | 1869.3 | 44.91 | 16.56 | 43.50 | 1.209 |
| S              | 0.021 | 0.025 | 0.221 | 33.520 | 0.962 | 0.291 | 0.358 | 0.014 |
| 1Pxy 1         | 4.21  | 10.30 | 43.36 | 1846.0 | 42.57 | 20.15 | 41.06 | 1.162 |
| 1Pxy 2         | 4.16  | 10.27 | 42.72 | 1834.1 | 42.93 | 20.23 | 41.02 | 1.167 |
| 1Pxy 3         | 4.18  | 10.20 | 42.64 | 1854.5 | 43.50 | 20.01 | 41.12 | 1.870 |
| $\bar{x}$      | 4.18  | 10.26 | 42.91 | 1844.9 | 43.00 | 20.13 | 41.07 | 1.400 |
| S              | 0.025 | 0.051 | 0.397 | 10.247 | 0.467 | 0.111 | 0.050 | 0.407 |
| 1Pz 1          | 3.99  | 10.07 | 40.18 | 1727.0 | 42.97 | 10.75 | 42.72 | 1.123 |
| 1Pz 2          | 3.98  | 10.05 | 40.00 | 1720.1 | 43.00 | 10.73 | 42.67 | 1.143 |
| 1Pz 3          | 4.00  | 10.00 | 40.00 | 1723.4 | 43.09 | 10.69 | 42.55 | 1.118 |
| $\bar{x}$      | 3.99  | 10.04 | 40.06 | 1723.5 | 43.02 | 10.72 | 42.65 | 1.128 |
| S              | 0.010 | 0.036 | 0.104 | 3.451  | 0.059 | 0.031 | 0.087 | 0.013 |

**Table S2.** Tensile properties of original material – water absorption.

| No.                    | $h$ , mm | $b$ , mm | $A_0$ , mm <sup>2</sup> | $F_m$ , N | $R_m$ , MPa | $\epsilon_p$ , % | $R_p$ , MPa | $E$ , GPa |
|------------------------|----------|----------|-------------------------|-----------|-------------|------------------|-------------|-----------|
| Drying 2 h at 100 °C   |          |          |                         |           |             |                  |             |           |
| 1Lxy 1                 | 4.15     | 9.98     | 41.42                   | 2091.1    | 50.49       | 27.39            | 48.10       | 1.696     |
| 1Lxy 2                 | 4.20     | 10.00    | 42.00                   | 2152.1    | 51.24       | 24.64            | 49.12       | 1.756     |
| 1Lxy 3                 | 4.18     | 10.00    | 41.8                    | 2127.2    | 50.89       | 24.91            | 47.47       | 1.789     |
| $\bar{x}$              | 4.18     | 9.99     | 41.74                   | 2123.5    | 50.87       | 25.65            | 48.23       | 1.747     |
| S                      | 0.025    | 0.012    | 0.296                   | 30.638    | 0.375       | 1.516            | 0.833       | 0.047     |
| 1Pxy 1                 | 4.06     | 10.22    | 41.49                   | 2082.1    | 50.18       | 24.37            | 47.45       | 1.628     |
| 1Pxy 2                 | 4.11     | 10.31    | 42.37                   | 2034.8    | 48.02       | 12.23            | 47.65       | 1.725     |
| 1Pxy 3                 | 4.05     | 10.21    | 41.35                   | 2073.3    | 50.14       | 23.03            | 48.34       | 1.691     |
| $\bar{x}$              | 4.07     | 10.25    | 41.74                   | 2063.4    | 49.45       | 19.88            | 47.81       | 1.681     |
| S                      | 0.032    | 0.055    | 0.554                   | 25.167    | 1.236       | 6.656            | 0.467       | 0.049     |
| 1Pz 1                  | 4.09     | 10.08    | 41.23                   | 1870.9    | 45.38       | 7.03             | 45.32       | 1.799     |
| 1Pz 2                  | 4.05     | 10.07    | 40.78                   | 1977.6    | 48.49       | 11.67            | 48.27       | 1.881     |
| 1Pz 3                  | 4.03     | 10.14    | 40.86                   | 1961.9    | 48.01       | 11.35            | 47.82       | 1.854     |
| $\bar{x}$              | 4.06     | 10.10    | 40.96                   | 1936.8    | 47.29       | 10.02            | 47.14       | 1.845     |
| S                      | 0.031    | 0.038    | 0.236                   | 57.609    | 1.674       | 2.590            | 1.589       | 0.042     |
| Water absorption 1 day |          |          |                         |           |             |                  |             |           |
| 1Lxy 1                 | 4.17     | 10.00    | 41.70                   | 2017.9    | 48.39       | 27.14            | 45.88       | 1.973     |
| 1Lxy 2                 | 4.20     | 9.98     | 41.92                   | 2012.4    | 48.01       | 28.95            | 44.49       | 2.112     |
| 1Lxy 3                 | 4.18     | 10.02    | 41.88                   | 1985.3    | 47.40       | 29.54            | 43.26       | 1.863     |
| $\bar{x}$              | 4.18     | 10.00    | 41.83                   | 2005.2    | 47.93       | 28.54            | 44.54       | 1.983     |
| S                      | 0.015    | 0.020    | 0.116                   | 17.446    | 0.499       | 1.251            | 1.311       | 0.125     |
| 1Pxy 1                 | 3.96     | 10.18    | 40.31                   | 1945.9    | 48.27       | 33.48            | 43.30       | 1.806     |
| 1Pxy 2                 | 3.94     | 10.30    | 40.58                   | 1941.4    | 47.84       | 33.04            | 38.53       | 1.819     |
| 1Pxy 3                 | 3.98     | 10.27    | 40.87                   | 1967.3    | 48.13       | 28.22            | 42.76       | 1.944     |
| $\bar{x}$              | 3.96     | 10.25    | 40.59                   | 1951.5    | 48.08       | 31.58            | 41.53       | 1.856     |
| S                      | 0.020    | 0.062    | 0.281                   | 13.820    | 0.219       | 2.918            | 2.612       | 0.076     |
| 1Pz 1                  | 3.98     | 9.97     | 39.68                   | 1879.7    | 47.37       | 13.04            | 47.14       | 1.890     |
| 1Pz 2                  | 4.07     | 10.11    | 41.15                   | 1895.3    | 46.06       | 16.22            | 45.51       | 1.863     |

|                          |       |       |       |        |       |       |       |       |
|--------------------------|-------|-------|-------|--------|-------|-------|-------|-------|
| 1Pz 3                    | 4.06  | 10.06 | 40.84 | 1777.1 | 43.51 | 7.06  | 43.43 | 1.829 |
| $\bar{x}$                | 4.04  | 10.05 | 40.56 | 1850.7 | 45.65 | 12.11 | 45.36 | 1.861 |
| S                        | 0.049 | 0.071 | 0.774 | 64.192 | 1.963 | 4.653 | 1.860 | 0.031 |
| Water absorption 4 days  |       |       |       |        |       |       |       |       |
| 1Lxy 1                   | 4.17  | 9.95  | 41.49 | 2028.1 | 48.88 | 27.41 | 44.00 | 1.794 |
| 1Lxy 2                   | 4.20  | 10.00 | 42.00 | 1982.8 | 47.21 | 33.12 | 42.82 | 1.824 |
| 1Lxy 3                   | 4.21  | 10.00 | 42.10 | 1993.0 | 47.34 | 30.28 | 44.24 | 1.970 |
| $\bar{x}$                | 4.19  | 9.98  | 41.86 | 2001.3 | 47.81 | 30.27 | 43.69 | 1.863 |
| S                        | 0.021 | 0.029 | 0.326 | 23.756 | 0.929 | 2.855 | 0.760 | 0.094 |
| 1Pxy 1                   | 3.99  | 10.38 | 41.42 | 1922.1 | 46.41 | 31.33 | 32.07 | 1.858 |
| 1Pxy 2                   | 4.02  | 10.29 | 41.37 | 1926.8 | 46.58 | 31.42 | 41.85 | 1.768 |
| 1Pxy 3                   | 4.02  | 10.30 | 41.41 | 1927.9 | 46.56 | 29.03 | 42.49 | 1.795 |
| $\bar{x}$                | 4.01  | 10.32 | 41.40 | 1925.6 | 46.52 | 30.59 | 38.80 | 1.807 |
| S                        | 0.017 | 0.049 | 0.027 | 3.056  | 0.093 | 1.355 | 5.840 | 0.046 |
| 1Pz 1                    | 4.10  | 10.16 | 41.66 | 1890.8 | 45.39 | 13.84 | 45.17 | 1.782 |
| 1Pz 2                    | 4.14  | 10.14 | 41.98 | 1881.9 | 44.83 | 13.52 | 37.35 | 1.777 |
| 1Pz 3                    | 4.09  | 10.13 | 41.43 | 1883.9 | 45.47 | 22.36 | 44.82 | 1.676 |
| $\bar{x}$                | 4.11  | 10.14 | 41.69 | 1885.5 | 45.23 | 16.57 | 42.45 | 1.745 |
| S                        | 0.026 | 0.015 | 0.275 | 4.633  | 0.349 | 5.014 | 4.417 | 0.060 |
| Water absorption 7 days  |       |       |       |        |       |       |       |       |
| 1Lxy 1                   | 4.19  | 10.00 | 41.90 | 1995.3 | 47.62 | 25.71 | 43.46 | 1.769 |
| 1Lxy 2                   | 4.22  | 10.03 | 42.33 | 1998.7 | 47.22 | 24.00 | 45.15 | 1.638 |
| 1Lxy 3                   | 4.26  | 10.04 | 42.77 | 2023.5 | 47.31 | 29.60 | 45.00 | 1.812 |
| $\bar{x}$                | 4.22  | 10.02 | 42.33 | 2005.8 | 47.38 | 26.44 | 44.54 | 1.740 |
| S                        | 0.035 | 0.021 | 0.435 | 15.392 | 0.210 | 2.870 | 0.935 | 0.091 |
| 1Pxy 1                   | 3.98  | 10.34 | 41.15 | 1921.0 | 46.68 | 29.82 | 39.69 | 1.659 |
| 1Pxy 2                   | 3.99  | 10.17 | 40.58 | 1911.2 | 47.10 | 32.61 | 42.83 | 1.776 |
| 1Pxy 3                   | 3.97  | 10.21 | 40.53 | 1930.2 | 47.62 | 28.40 | 41.37 | 1.964 |
| $\bar{x}$                | 3.98  | 10.24 | 40.76 | 1920.8 | 47.13 | 30.28 | 41.30 | 1.800 |
| S                        | 0.010 | 0.089 | 0.346 | 9.490  | 0.471 | 2.142 | 1.571 | 0.154 |
| 1Pz 1                    | 4.07  | 10.09 | 41.07 | 1855.8 | 45.19 | 15.10 | 41.80 | 1.720 |
| 1Pz 2                    | 4.06  | 10.08 | 40.92 | 1873.9 | 45.79 | 22.51 | 45.38 | 1.743 |
| 1Pz 3                    | 4.06  | 10.08 | 40.92 | 1875.2 | 45.82 | 24.01 | 44.94 | 1.975 |
| $\bar{x}$                | 4.06  | 10.08 | 40.97 | 1868.3 | 45.60 | 20.54 | 44.04 | 1.813 |
| S                        | 0.006 | 0.006 | 0.082 | 10.857 | 0.355 | 4.771 | 1.952 | 0.141 |
| Water absorption 14 days |       |       |       |        |       |       |       |       |
| 1Lxy 1                   | 4.18  | 10.06 | 42.05 | 1976.0 | 46.99 | 28.51 | 44.18 | 1.776 |
| 1Lxy 2                   | 4.18  | 10.01 | 41.84 | 2017.6 | 48.22 | 23.98 | 45.59 | 1.604 |
| 1Lxy 3                   | 4.19  | 10.06 | 42.15 | 1986.2 | 47.12 | 29.62 | 44.43 | 1.555 |
| $\bar{x}$                | 4.18  | 10.04 | 42.01 | 1993.3 | 47.44 | 27.37 | 44.73 | 1.645 |
| S                        | 0.006 | 0.029 | 0.158 | 21.705 | 0.676 | 2.988 | 0.752 | 0.116 |
| 1Pxy 1                   | 3.99  | 10.28 | 41.02 | 1916.3 | 46.72 | 29.31 | 42.94 | 1.695 |
| 1Pxy 2                   | 4.01  | 10.29 | 41.26 | 1906.3 | 46.20 | 33.08 | 41.35 | 1.706 |
| 1Pxy 3                   | 4.00  | 10.27 | 41.08 | 1946.8 | 47.39 | 28.52 | 41.83 | 1.819 |
| $\bar{x}$                | 4.00  | 10.28 | 41.12 | 1923.2 | 46.77 | 30.30 | 42.04 | 1.740 |
| S                        | 0.010 | 0.010 | 0.128 | 21.064 | 0.597 | 2.437 | 0.816 | 0.069 |
| 1Pz 1                    | 4.09  | 10.10 | 41.31 | 1843.2 | 44.62 | 11.43 | 44.38 | 1.439 |
| 1Pz 2                    | 4.08  | 10.07 | 41.09 | 1848.0 | 44.98 | 17.54 | 44.35 | 1.615 |
| 1Pz 3                    | 4.06  | 10.10 | 41.01 | 1791.6 | 43.69 | 11.21 | 43.34 | 1.594 |
| $\bar{x}$                | 4.08  | 10.09 | 41.13 | 1827.6 | 44.43 | 13.39 | 44.02 | 1.549 |
| S                        | 0.015 | 0.017 | 0.157 | 31.308 | 0.666 | 3.593 | 0.592 | 0.096 |
| Water absorption 28 days |       |       |       |        |       |       |       |       |

|           |       |       |       |        |       |       |       |       |
|-----------|-------|-------|-------|--------|-------|-------|-------|-------|
| 1Lxy 1    | 4.18  | 10.08 | 42.13 | 1896.5 | 45.01 | 31.11 | 41.88 | 1.507 |
| 1Lxy 2    | 4.19  | 10.02 | 41.98 | 1888.4 | 44.98 | 36.60 | 40.10 | 1.544 |
| 1Lxy 3    | 4.20  | 10.06 | 42.25 | 1872.6 | 44.32 | 33.19 | 39.82 | 1.488 |
| $\bar{x}$ | 4.19  | 10.05 | 42.12 | 1885.8 | 44.77 | 33.63 | 40.6  | 1.513 |
| S         | 0.010 | 0.031 | 0.134 | 12.140 | 0.390 | 2.772 | 1.117 | 0.028 |
| 1Pxy 1    | 3.96  | 10.35 | 40.99 | 1807.5 | 44.10 | 34.66 | 36.77 | 1.385 |
| 1Pxy 2    | 4.02  | 10.33 | 41.53 | 1844.6 | 44.42 | 34.55 | 40.25 | 1.419 |
| 1Pxy 3    | 4.00  | 10.31 | 41.24 | 1805.1 | 43.77 | 36.59 | 38.48 | 1.328 |
| $\bar{x}$ | 3.99  | 10.33 | 41.25 | 1819.1 | 44.10 | 35.27 | 38.50 | 1.377 |
| S         | 0.031 | 0.020 | 0.270 | 22.164 | 0.325 | 1.147 | 1.740 | 0.046 |
| 1Pz 1     | 4.12  | 10.12 | 41.69 | 1742.4 | 41.79 | 11.77 | 41.65 | 1.391 |
| 1Pz 2     | 4.11  | 10.16 | 41.76 | 1728.8 | 41.40 | 11.90 | 41.08 | 1.369 |
| 1Pz 3     | 4.05  | 10.1  | 40.91 | 1693.9 | 41.41 | 10.56 | 40.86 | 1.263 |
| $\bar{x}$ | 4.09  | 10.13 | 41.45 | 1721.7 | 41.53 | 11.41 | 41.20 | 1.341 |
| S         | 0.038 | 0.031 | 0.475 | 25.029 | 0.222 | 0.739 | 0.408 | 0.068 |

**Table S3.** Tensile properties of mixed material.

| No.                         | $h$ , mm | $b$ , mm | $A_0$ , mm <sup>2</sup> | $F_m$ , N | $R_m$ , MPa | $\varepsilon_p$ , % | $R_p$ , MPa | $E$ , GPa |
|-----------------------------|----------|----------|-------------------------|-----------|-------------|---------------------|-------------|-----------|
| Before exposure             |          |          |                         |           |             |                     |             |           |
| M1Lxy 1                     | 4.17     | 10.09    | 42.08                   | 2033      | 48.32       | 24.08               | 44.71       | 1.724     |
| M1Lxy 2                     | 4.13     | 9.99     | 41.26                   | 1996      | 48.38       | 25.05               | 43.23       | 2.057     |
| M1Lxy 3                     | 4.15     | 9.96     | 41.33                   | 1994      | 48.24       | 24.67               | 44.37       | 1.761     |
| $\bar{x}$                   | 4.15     | 10.01    | 41.56                   | 2007.7    | 48.31       | 24.60               | 44.10       | 1.847     |
| S                           | 0.020    | 0.068    | 0.451                   | 21.962    | 0.070       | 0.489               | 0.775       | 0.183     |
| M1Pxy 1                     | 4.07     | 10.32    | 42.00                   | 1985      | 47.25       | 19.51               | 40.43       | 1.646     |
| M1Pxy 2                     | 4.11     | 10.27    | 42.21                   | 1992      | 47.18       | 25.19               | 40.73       | 2.435     |
| M1Pxy 3                     | 4.07     | 10.24    | 41.68                   | 1943      | 46.62       | 24.19               | 40.69       | 1.834     |
| $\bar{x}$                   | 4.08     | 10.28    | 41.96                   | 1973.3    | 47.02       | 22.96               | 40.62       | 1.972     |
| S                           | 0.023    | 0.040    | 0.269                   | 26.502    | 0.345       | 3.032               | 0.163       | 0.412     |
| M1Pz 1                      | 4.01     | 10.01    | 40.14                   | 1572      | 39.16       | 6.09                | 37.62       | 1.694     |
| M1Pz 2                      | 4.00     | 10.02    | 40.08                   | 1683      | 42.00       | 6.17                | 41.89       | 2.000     |
| M1Pz 3                      | 4.00     | 10.00    | 40.00                   | 1426      | 35.65       | 5.04                | 28.17       | 1.739     |
| $\bar{x}$                   | 4.00     | 10.01    | 40.07                   | 1560.3    | 38.94       | 5.76                | 35.89       | 1.811     |
| S                           | 0.006    | 0.010    | 0.070                   | 128.897   | 3.181       | 0.632               | 7.021       | 0.165     |
| Ageing in UV chamber 1000 h |          |          |                         |           |             |                     |             |           |
| M1Lxy 1                     | 4.16     | 9.99     | 41.56                   | 1995      | 48.00       | 19.02               | 46.10       | 1.241     |
| M1Lxy 2                     | 4.18     | 10.08    | 42.13                   | 2010      | 47.72       | 17.12               | 45.95       | 1.260     |
| M1Lxy 3                     | 4.14     | 10.00    | 41.40                   | 1997      | 48.24       | 17.51               | 46.88       | 1.319     |
| $\bar{x}$                   | 4.16     | 10.02    | 41.70                   | 2000.7    | 47.99       | 17.88               | 46.31       | 1.273     |
| S                           | 0.020    | 0.049    | 0.386                   | 8.145     | 0.260       | 1.004               | 0.499       | 0.041     |
| M1Pxy 1                     | 4.09     | 10.26    | 41.96                   | 1960      | 46.70       | 17.30               | 44.96       | 1.267     |
| M1Pxy 2                     | 4.02     | 10.24    | 41.16                   | 1951      | 47.39       | 17.76               | 44.82       | 1.249     |
| M1Pxy 3                     | 4.13     | 10.27    | 42.42                   | 2006      | 47.29       | 18.75               | 44.72       | 1.256     |
| $\bar{x}$                   | 4.08     | 10.26    | 41.85                   | 1972.3    | 47.13       | 17.94               | 44.83       | 1.257     |
| S                           | 0.056    | 0.015    | 0.633                   | 29.501    | 0.373       | 0.741               | 0.121       | 0.009     |
| M1Pz 1                      | 3.98     | 9.97     | 39.68                   | 1418      | 35.73       | 4.60                | 35.65       | 1.208     |
| M1Pz 2                      | 3.98     | 10.00    | 39.80                   | 1690      | 42.46       | 7.55                | 42.15       | 1.283     |
| M1Pz 3                      | 4.01     | 10.01    | 40.14                   | 1274      | 31.74       | 3.76                | 31.74       | 1.183     |
| $\bar{x}$                   | 3.99     | 9.99     | 39.87                   | 1460.7    | 36.64       | 5.30                | 36.51       | 1.225     |
| S                           | 0.017    | 0.021    | 0.238                   | 211.257   | 5.418       | 1.994               | 5.258       | 0.052     |

| Natural ageing           |       |       |       |        |       |       |       |        |
|--------------------------|-------|-------|-------|--------|-------|-------|-------|--------|
| M1Lxy 1                  | 4.16  | 9.97  | 41.48 | 1898   | 45.75 | 16.74 | 43.82 | 1.225  |
| M1Lxy 2                  | 4.11  | 10.00 | 41.10 | 1892   | 46.03 | 16.55 | 43.01 | 1.234  |
| M1Lxy 3                  | 4.09  | 9.98  | 40.82 | 1901   | 46.57 | 17.01 | 43.76 | 1.201  |
| $\bar{x}$                | 4.12  | 9.98  | 41.13 | 1897.0 | 46.12 | 16.77 | 43.53 | 1.220  |
| S                        | 0.036 | 0.015 | 0.330 | 4.583  | 0.418 | 0.231 | 0.451 | 0.017  |
| M1Pxy 1                  | 4.07  | 10.21 | 41.55 | 1909   | 45.93 | 19.59 | 42.47 | 1.282  |
| M1Pxy 2                  | 4.01  | 10.19 | 40.86 | 1889   | 46.23 | 19.43 | 42.43 | 1.279  |
| M1Pxy 3                  | 4.05  | 10.10 | 40.91 | 1905   | 46.57 | 19.78 | 42.53 | 1.305  |
| $\bar{x}$                | 4.04  | 10.17 | 41.11 | 1901.0 | 46.24 | 19.60 | 42.48 | 1.289  |
| S                        | 0.031 | 0.059 | 0.388 | 10.583 | 0.321 | 0.175 | 0.050 | 0.014  |
| M1Pz 1                   | 4.01  | 10.00 | 40.10 | 1340   | 33.41 | 4.10  | 33.38 | 1.113  |
| M1Pz 2                   | 4.02  | 10.01 | 40.24 | 1332   | 33.10 | 4.01  | 33.23 | 1.231  |
| M1Pz 3                   | 4.00  | 10.01 | 40.04 | 1345   | 33.59 | 4.23  | 33.34 | 1.110  |
| $\bar{x}$                | 4.01  | 10.01 | 40.13 | 1339.0 | 33.37 | 4.11  | 33.32 | 1.151  |
| S                        | 0.010 | 0.006 | 0.103 | 6.557  | 0.248 | 0.110 | 0.078 | 0.069  |
| Water absorption 28 days |       |       |       |        |       |       |       |        |
| M1Lxy 1                  | 4.16  | 10.00 | 41.60 | 1907   | 45.84 | 23.51 | 35.68 | 1.849  |
| M1Lxy 2                  | 4.16  | 9.96  | 41.43 | 1909   | 46.08 | 24.08 | 40.87 | 1.816  |
| M1Lxy 3                  | 4.16  | 9.98  | 41.52 | 1904   | 45.85 | 26.77 | 37.70 | 1.503  |
| $\bar{x}$                | 4.16  | 9.98  | 41.52 | 1906.7 | 45.92 | 24.79 | 38.08 | 1.723  |
| S                        | 0.000 | 0.020 | 0.083 | 2.517  | 0.136 | 1.741 | 2.616 | 0.191  |
| M1Pxy 1                  | 4.04  | 10.25 | 41.41 | 1886   | 45.53 | 23.20 | 24.08 | 1.7810 |
| M1Pxy 2                  | 4.07  | 10.24 | 41.68 | 1896   | 45.48 | 25.00 | 39.52 | 1.5870 |
| M1Pxy 3                  | 4.04  | 10.25 | 41.41 | 1863   | 44.99 | 24.95 | 40.40 | 1.6010 |
| $\bar{x}$                | 4.05  | 10.25 | 41.50 | 1881.7 | 45.33 | 24.38 | 34.67 | 1.656  |
| S                        | 0.017 | 0.006 | 0.154 | 16.921 | 0.298 | 1.025 | 9.179 | 0.108  |
| M1Pz 1                   | 4.02  | 10.00 | 40.20 | 1662   | 41.34 | 10.05 | 41.09 | 1.492  |
| M1Pz 2                   | 4.01  | 9.98  | 40.02 | 1703   | 42.56 | 12.21 | 41.89 | 1.631  |
| M1Pz 3                   | 4.01  | 10.04 | 40.26 | 1517   | 37.67 | 7.16  | 37.45 | 1.565  |
| $\bar{x}$                | 4.01  | 10.01 | 40.16 | 1627.3 | 40.52 | 9.81  | 40.14 | 1.563  |
| S                        | 0.006 | 0.031 | 0.125 | 97.726 | 2.545 | 2.532 | 2.367 | 0.070  |

**Table S4.** Tensile properties of 100% recycled material.

| No.             | $h$ , mm | $b$ , mm | $A_0$ , mm <sup>2</sup> | $F_m$ , N | $R_m$ , MPa | $\varepsilon_p$ , % | $R_p$ , MPa | $E$ , GPa |
|-----------------|----------|----------|-------------------------|-----------|-------------|---------------------|-------------|-----------|
| Before exposure |          |          |                         |           |             |                     |             |           |
| R1Lxy 1         | 4.15     | 9.8      | 40.67                   | 1867      | 45.90       | 30.31               | 38.29       | 1.525     |
| R1Lxy 2         | 4.17     | 10.06    | 41.95                   | 1938      | 46.19       | 23.25               | 38.33       | 1.605     |
| R1Lxy 3         | 4.17     | 10.00    | 41.70                   | 1915      | 45.92       | 20.63               | 38.00       | 1.607     |
| $\bar{x}$       | 4.16     | 9.95     | 41.44                   | 1906.7    | 46.00       | 24.73               | 38.21       | 1.579     |
| S               | 0.012    | 0.136    | 0.679                   | 36.226    | 0.162       | 5.007               | 0.180       | 0.047     |
| R1Pxy 1         | 3.99     | 10.18    | 40.62                   | 1816      | 44.71       | 25.32               | 27.24       | 1.611     |
| R1Pxy 2         | 4.05     | 10.25    | 41.51                   | 1841      | 44.34       | 19.10               | 37.57       | 1.631     |
| R1Pxy 3         | 3.98     | 10.23    | 40.72                   | 1795      | 44.08       | 20.88               | 37.81       | 1.868     |
| $\bar{x}$       | 4.01     | 10.22    | 40.95                   | 1817.3    | 44.38       | 21.77               | 34.21       | 1.703     |
| S               | 0.038    | 0.036    | 0.491                   | 23.029    | 0.317       | 3.203               | 6.035       | 0.143     |
| R1Pz 1          | 4.08     | 10.01    | 40.84                   | 1920      | 47.02       | 10.42               | 38.65       | 2.099     |
| R1Pz 2          | 4.02     | 10.01    | 40.24                   | 1901      | 47.25       | 10.19               | 29.06       | 1.823     |
| R1Pz 3          | 4.01     | 10.00    | 40.10                   | 1857      | 46.32       | 10.27               | 44.78       | 1.728     |
| $\bar{x}$       | 4.04     | 10.01    | 40.39                   | 1892.7    | 46.86       | 10.29               | 37.50       | 1.883     |

|                             |       |       |       |         |       |       |       |       |
|-----------------------------|-------|-------|-------|---------|-------|-------|-------|-------|
| S                           | 0.038 | 0.006 | 0.394 | 32.316  | 0.484 | 0.117 | 7.923 | 0.193 |
| Ageing in UV chamber 1000 h |       |       |       |         |       |       |       |       |
| R1Lxy 1                     | 4.15  | 9.85  | 40.88 | 1817    | 44.45 | 22.47 | 41.89 | 1.192 |
| R1Lxy 2                     | 4.13  | 9.89  | 40.85 | 1810    | 44.32 | 19.74 | 41.07 | 1.168 |
| R1Lxy 3                     | 4.14  | 9.99  | 41.36 | 1804    | 43.61 | 24.89 | 39.37 | 1.203 |
| $\bar{x}$                   | 4.14  | 9.91  | 41.03 | 1810.3  | 44.13 | 22.37 | 40.78 | 1.188 |
| S                           | 0.010 | 0.072 | 0.287 | 6.506   | 0.452 | 2.577 | 1.285 | 0.018 |
| R1Pxy 1                     | 4.03  | 10.21 | 41.15 | 1728    | 42.00 | 22.99 | 39.41 | 1.181 |
| R1Pxy 2                     | 4.02  | 10.2  | 41.00 | 1721    | 41.98 | 22.41 | 39.84 | 1.159 |
| R1Pxy 3                     | 3.99  | 10.21 | 40.74 | 1718    | 42.17 | 23.85 | 38.06 | 1.161 |
| $\bar{x}$                   | 4.01  | 10.21 | 40.96 | 1722.3  | 42.05 | 23.08 | 39.10 | 1.167 |
| S                           | 0.021 | 0.006 | 0.207 | 5.132   | 0.104 | 0.725 | 0.929 | 0.012 |
| R1Pz 1                      | 4.08  | 10.05 | 41.00 | 1741    | 42.45 | 10.13 | 41.87 | 1.211 |
| R1Pz 2                      | 4.07  | 10.03 | 40.82 | 1739    | 42.61 | 11.21 | 42.14 | 1.209 |
| R1Pz 3                      | 4.08  | 10.04 | 40.96 | 1739    | 42.46 | 10.13 | 41.83 | 1.207 |
| $\bar{x}$                   | 4.08  | 10.04 | 40.93 | 1739.7  | 42.51 | 10.49 | 41.95 | 1.209 |
| S                           | 0.006 | 0.010 | 0.095 | 1.155   | 0.090 | 0.624 | 0.169 | 0.002 |
| Natural ageing              |       |       |       |         |       |       |       |       |
| R1Lxy 1                     | 4.09  | 9.96  | 40.74 | 1788    | 43.90 | 16.68 | 41.72 | 1.238 |
| R1Lxy 2                     | 4.05  | 9.98  | 40.42 | 1775    | 43.91 | 16.21 | 41.73 | 1.204 |
| R1Lxy 3                     | 4.04  | 10.01 | 40.44 | 1952    | 48.27 | 16.71 | 41.54 | 1.245 |
| $\bar{x}$                   | 4.06  | 9.98  | 40.53 | 1838.3  | 45.36 | 16.53 | 41.66 | 1.229 |
| S                           | 0.026 | 0.025 | 0.177 | 98.653  | 2.518 | 0.280 | 0.107 | 0.022 |
| R1Pxy 1                     | 3.93  | 10.21 | 40.13 | 1683    | 41.93 | 13.92 | 40.14 | 1.157 |
| R1Pxy 2                     | 3.98  | 10.11 | 40.24 | 1657    | 41.18 | 14.02 | 39.98 | 1.145 |
| R1Pxy 3                     | 3.96  | 10.19 | 40.35 | 1698    | 42.08 | 13.89 | 40.32 | 1.160 |
| $\bar{x}$                   | 3.96  | 10.17 | 40.24 | 1679.3  | 41.73 | 13.94 | 40.15 | 1.154 |
| S                           | 0.025 | 0.053 | 0.114 | 20.744  | 0.482 | 0.068 | 0.170 | 0.008 |
| R1Pz 1                      | 4.02  | 9.99  | 40.16 | 1583    | 39.41 | 8.15  | 38.90 | 1.155 |
| R1Pz 2                      | 4.01  | 10.00 | 40.10 | 1580    | 39.40 | 8.23  | 38.62 | 1.161 |
| R1Pz 3                      | 3.99  | 10.02 | 39.98 | 1556    | 38.92 | 7.98  | 39.14 | 1.152 |
| $\bar{x}$                   | 4.01  | 10.00 | 40.08 | 1573.0  | 39.24 | 8.12  | 38.89 | 1.156 |
| S                           | 0.015 | 0.015 | 0.092 | 14.799  | 0.281 | 0.127 | 0.260 | 0.005 |
| Water absorption 28 days    |       |       |       |         |       |       |       |       |
| R1Lxy 1                     | 4.19  | 9.90  | 41.48 | 1737    | 41.87 | 36.21 | 28.91 | 1.105 |
| R1Lxy 2                     | 4.14  | 9.95  | 41.19 | 1724    | 41.86 | 37.73 | 33.59 | 1.090 |
| R1Lxy 3                     | 4.28  | 9.85  | 42.16 | 1690    | 40.08 | 25.44 | 33.68 | 1.050 |
| $\bar{x}$                   | 4.20  | 9.90  | 41.61 | 1717.0  | 41.27 | 33.13 | 32.06 | 1.082 |
| S                           | 0.071 | 0.050 | 0.495 | 24.269  | 1.031 | 6.700 | 2.728 | 0.028 |
| R1Pxy 1                     | 4.03  | 10.19 | 41.07 | 1658    | 40.38 | 39.99 | 32.33 | 1.037 |
| R1Pxy 2                     | 4.04  | 10.29 | 41.57 | 1661    | 39.97 | 32.02 | 33.34 | 1.046 |
| R1Pxy 3                     | 4.05  | 10.32 | 41.80 | 1658    | 39.67 | 29.28 | 32.22 | 1.011 |
| $\bar{x}$                   | 4.04  | 10.27 | 41.48 | 1659.0  | 40.01 | 33.76 | 32.63 | 1.031 |
| S                           | 0.010 | 0.068 | 0.374 | 1.732   | 0.356 | 5.564 | 0.617 | 0.018 |
| R1Pz 1                      | 3.97  | 10.00 | 39.70 | 1379    | 34.74 | 8.25  | 33.81 | 1.081 |
| R1Pz 2                      | 4.04  | 10.03 | 40.52 | 1632    | 40.28 | 11.95 | 39.36 | 1.160 |
| R1Pz 3                      | 4.06  | 10.02 | 40.68 | 1576    | 38.74 | 11.08 | 25.23 | 1.121 |
| $\bar{x}$                   | 4.02  | 10.02 | 40.30 | 1529.0  | 37.92 | 10.43 | 32.80 | 1.121 |
| S                           | 0.047 | 0.015 | 0.526 | 132.887 | 2.860 | 1.933 | 7.119 | 0.040 |

**Table S5.** Flexural properties of original material.

| No.                         | $h$ , mm | $b$ , mm | $A_0$ , mm <sup>2</sup> | $F_{max}$ , N | $\sigma_{fm}$ , MPa | $\varepsilon_{fm}$ , % | $S_{max}$ , mm | $\varepsilon_{fp}$ , % | $\sigma_p$ , MPa | $E_f$ , GPa |
|-----------------------------|----------|----------|-------------------------|---------------|---------------------|------------------------|----------------|------------------------|------------------|-------------|
| Before exposure             |          |          |                         |               |                     |                        |                |                        |                  |             |
| 2Lxy 1                      | 4.20     | 9.97     | 41.87                   | 120.3         | 65.69               | 7.56                   | 12.29          | 9.98                   | 63.24            | 1.584       |
| 2Lxy 2                      | 4.17     | 10.01    | 41.74                   | 116.9         | 64.50               | 7.54                   | 12.34          | 15.90                  | 41.56            | 1.504       |
| 2Lxy 3                      | 4.15     | 10.02    | 41.58                   | 116.9         | 65.06               | 6.96                   | 11.45          | 9.89                   | 63.20            | 1.493       |
| $\bar{x}$                   | 4.17     | 10.00    | 41.73                   | 118.0         | 65.08               | 7.35                   | 12.03          | 11.92                  | 56.00            | 1.527       |
| S                           | 0.025    | 0.026    | 0.146                   | 1.963         | 0.595               | 0.341                  | 0.500          | 3.444                  | 12.505           | 0.050       |
| 2Pxy 1                      | 3.97     | 10.28    | 40.81                   | 105.7         | 62.63               | 7.05                   | 12.13          | 9.43                   | 59.96            | 1.541       |
| 2Pxy 2                      | 4.00     | 10.25    | 41.00                   | 110.2         | 64.51               | 7.64                   | 13.05          | 9.87                   | 61.23            | 1.690       |
| 2Pxy 3                      | 4.01     | 10.25    | 41.10                   | 107.9         | 62.88               | 8.12                   | 13.83          | 9.99                   | 58.94            | 1.567       |
| $\bar{x}$                   | 3.99     | 10.26    | 40.97                   | 107.9         | 63.34               | 7.61                   | 13.00          | 9.76                   | 60.04            | 1.599       |
| S                           | 0.021    | 0.017    | 0.148                   | 2.250         | 1.021               | 0.535                  | 0.851          | 0.294                  | 1.147            | 0.080       |
| 2Pz 1                       | 4.00     | 9.98     | 39.92                   | 104.6         | 62.89               | 7.44                   | 12.69          | 9.93                   | 56.25            | 1.629       |
| 2Pz 2                       | 4.02     | 10.00    | 40.20                   | 103.4         | 61.45               | 7.15                   | 12.14          | 10.40                  | 56.01            | 1.569       |
| 2Pz 3                       | 4.05     | 10.04    | 40.66                   | 105.7         | 61.62               | 7.31                   | 12.32          | 14.63                  | 47.19            | 1.619       |
| $\bar{x}$                   | 4.02     | 10.01    | 40.26                   | 104.6         | 61.99               | 7.30                   | 12.38          | 11.65                  | 53.15            | 1.606       |
| S                           | 0.025    | 0.031    | 0.375                   | 1.150         | 0.787               | 0.144                  | 0.280          | 2.587                  | 5.163            | 0.032       |
| Ageing in UV chamber 500 h  |          |          |                         |               |                     |                        |                |                        |                  |             |
| 2Lxy 1                      | 4.17     | 10.03    | 41.83                   | 119.3         | 65.64               | 7.98                   | 13.07          | 10.27                  | 63.16            | 1.602       |
| 2Lxy 2                      | 4.21     | 9.96     | 41.93                   | 121.5         | 66.07               | 7.58                   | 12.29          | 10.02                  | 63.00            | 1.493       |
| 2Lxy 3                      | 4.16     | 10.03    | 41.72                   | 120.3         | 66.56               | 7.17                   | 11.77          | 9.96                   | 63.47            | 1.497       |
| $\bar{x}$                   | 4.18     | 10.01    | 41.83                   | 120.4         | 66.09               | 7.58                   | 12.38          | 10.08                  | 63.21            | 1.531       |
| S                           | 0.026    | 0.040    | 0.103                   | 1.102         | 0.460               | 0.407                  | 0.654          | 0.165                  | 0.239            | 0.062       |
| 2Pxy 1                      | 4.03     | 10.27    | 41.39                   | 108.0         | 62.16               | 7.44                   | 12.61          | 9.57                   | 59.57            | 1.493       |
| 2Pxy 2                      | 3.95     | 10.29    | 40.65                   | 108.0         | 64.58               | 7.46                   | 12.90          | 10.35                  | 59.85            | 1.665       |
| 2Pxy 3                      | 4.06     | 10.24    | 41.57                   | 111.3         | 63.33               | 8.37                   | 14.07          | 9.69                   | 60.77            | 1.459       |
| $\bar{x}$                   | 4.01     | 10.27    | 41.20                   | 109.1         | 63.36               | 7.76                   | 13.19          | 9.87                   | 60.06            | 1.539       |
| S                           | 0.057    | 0.025    | 0.491                   | 1.905         | 1.210               | 0.528                  | 0.773          | 0.419                  | 0.628            | 0.110       |
| 2Pz 1                       | 4.07     | 10.06    | 40.94                   | 110.3         | 63.51               | 7.20                   | 12.08          | 11.61                  | 56.37            | 1.483       |
| 2Pz 2                       | 4.02     | 10.09    | 40.56                   | 106.8         | 62.91               | 6.93                   | 11.77          | 11.01                  | 56.25            | 1.549       |
| 2Pz 3                       | 4.04     | 10.04    | 40.56                   | 105.8         | 61.95               | 7.10                   | 12.00          | 9.98                   | 56.06            | 1.535       |
| $\bar{x}$                   | 4.04     | 10.06    | 40.69                   | 107.6         | 62.79               | 7.08                   | 11.95          | 10.87                  | 56.23            | 1.522       |
| S                           | 0.025    | 0.025    | 0.221                   | 2.363         | 0.787               | 0.137                  | 0.161          | 0.825                  | 0.156            | 0.035       |
| Ageing in UV chamber 1000 h |          |          |                         |               |                     |                        |                |                        |                  |             |
| 2Lxy 1                      | 4.17     | 9.96     | 41.53                   | 137.3         | 74.52               | 8.24                   | 13.35          | 13.20                  | 64.75            | 1.612       |
| 2Lxy 2                      | 4.22     | 9.96     | 42.03                   | 138.4         | 73.58               | 7.92                   | 12.73          | 12.79                  | 66.41            | 1.606       |
| 2Lxy 3                      | 4.15     | 10.05    | 41.71                   | 136.2         | 74.03               | 7.38                   | 12.02          | 13.71                  | 61.80            | 1.749       |
| $\bar{x}$                   | 4.18     | 9.99     | 41.76                   | 137.3         | 74.04               | 7.85                   | 12.70          | 13.23                  | 64.32            | 1.656       |
| S                           | 0.036    | 0.052    | 0.253                   | 1.100         | 0.470               | 0.436                  | 0.666          | 0.461                  | 2.335            | 0.081       |
| 2Pxy 1                      | 3.97     | 10.31    | 40.93                   | 126.1         | 74.47               | 7.42                   | 12.76          | 12.45                  | 65.84            | 1.832       |
| 2Pxy 2                      | 4.01     | 10.28    | 41.22                   | 126.1         | 73.20               | 7.25                   | 12.33          | 12.60                  | 64.06            | 1.719       |
| 2Pxy 3                      | 3.99     | 10.27    | 40.98                   | 127.2         | 74.69               | 7.95                   | 13.60          | 12.70                  | 64.76            | 1.828       |
| $\bar{x}$                   | 3.99     | 10.29    | 41.04                   | 126.5         | 74.12               | 7.54                   | 12.90          | 12.58                  | 64.89            | 1.793       |
| S                           | 0.020    | 0.021    | 0.157                   | 0.635         | 0.804               | 0.367                  | 0.646          | 0.126                  | 0.897            | 0.064       |
| 2Pz 1                       | 4.05     | 10.04    | 40.66                   | 122.7         | 71.53               | 7.33                   | 12.36          | 10.07                  | 64.01            | 1.810       |
| 2Pz 2                       | 4.02     | 10.04    | 40.36                   | 121.6         | 71.92               | 7.15                   | 12.14          | 7.79                   | 71.92            | 1.636       |
| 2Pz 3                       | 4.04     | 10.02    | 40.48                   | 117.1         | 68.71               | 5.99                   | 10.12          | 8.96                   | 67.50            | 1.547       |
| $\bar{x}$                   | 4.04     | 10.03    | 40.50                   | 120.5         | 70.72               | 6.82                   | 11.54          | 8.94                   | 67.81            | 1.664       |
| S                           | 0.015    | 0.012    | 0.152                   | 2.967         | 1.752               | 0.731                  | 1.235          | 1.140                  | 3.964            | 0.134       |

| Natural ageing |       |       |       |       |       |       |       |       |       |       |
|----------------|-------|-------|-------|-------|-------|-------|-------|-------|-------|-------|
| 2Lxy 1         | 4.22  | 10.00 | 42.20 | 133.9 | 72.15 | 8.03  | 13.00 | 13.01 | 61.86 | 1.626 |
| 2Lxy 2         | 4.16  | 10.02 | 41.68 | 123.1 | 71.98 | 7.98  | 13.50 | 13.14 | 61.40 | 1.601 |
| 2Lxy 3         | 4.18  | 10.01 | 41.84 | 135.4 | 73.15 | 8.12  | 12.40 | 12.87 | 62.55 | 1.636 |
| $\bar{x}$      | 4.19  | 10.01 | 41.91 | 130.8 | 72.43 | 8.04  | 12.97 | 13.01 | 61.94 | 1.621 |
| S              | 0.031 | 0.010 | 0.265 | 6.710 | 0.632 | 0.071 | 0.551 | 0.135 | 0.579 | 0.018 |
| 2Pxy 1         | 4.03  | 10.29 | 41.47 | 119.3 | 68.50 | 7.19  | 12.17 | 12.78 | 58.79 | 0.935 |
| 2Pxy 2         | 4.00  | 10.24 | 40.96 | 120.1 | 68.01 | 7.01  | 12.54 | 12.77 | 57.89 | 0.968 |
| 2Pxy 3         | 4.02  | 10.20 | 41.00 | 118.5 | 69.12 | 7.34  | 12.21 | 12.04 | 58.56 | 0.924 |
| $\bar{x}$      | 4.02  | 10.24 | 41.14 | 119.3 | 68.54 | 7.18  | 12.31 | 12.53 | 58.41 | 0.942 |
| S              | 0.015 | 0.045 | 0.282 | 0.820 | 0.556 | 0.165 | 0.203 | 0.424 | 0.468 | 0.023 |
| 2Pz 1          | 4.03  | 10.05 | 40.50 | 115.8 | 68.14 | 6.97  | 11.80 | 12.18 | 52.50 | 1.382 |
| 2Pz 2          | 3.97  | 10.00 | 39.70 | 115.1 | 68.01 | 6.51  | 11.54 | 12.01 | 52.87 | 1.300 |
| 2Pz 3          | 4.02  | 10.09 | 40.56 | 116.2 | 68.81 | 6.35  | 11.33 | 12.23 | 52.01 | 1.412 |
| $\bar{x}$      | 4.01  | 10.05 | 40.25 | 115.7 | 68.32 | 6.61  | 11.56 | 12.14 | 52.46 | 1.365 |
| S              | 0.032 | 0.045 | 0.481 | 0.557 | 0.429 | 0.320 | 0.235 | 0.115 | 0.431 | 0.058 |

**Table S6.** Flexural properties of original material – water absorption.

| No.                    | $h$ , mm | $b$ , mm | $A_0$ , mm <sup>2</sup> | $F_{\max}$ , N | $\sigma_{fm}$ , MPa | $\varepsilon_{fm}$ , % | $S_{\max}$ , mm | $\varepsilon_{fp}$ , % | $\sigma_{fp}$ , MPa | $E_t$ , GPa |
|------------------------|----------|----------|-------------------------|----------------|---------------------|------------------------|-----------------|------------------------|---------------------|-------------|
| Drying 6 h at 100 °C   |          |          |                         |                |                     |                        |                 |                        |                     |             |
| 2Lxy 1                 | 4.18     | 9.98     | 41.72                   | 119.2          | 65.62               | 7.56                   | 12.35           | 10.40                  | 63.15               | 1.538       |
| 2Lxy 2                 | 4.19     | 9.97     | 41.77                   | 122.6          | 67.24               | 7.88                   | 12.84           | 10.47                  | 63.54               | 1.540       |
| 2Lxy 3                 | 4.20     | 9.98     | 41.92                   | 121.4          | 66.23               | 7.49                   | 12.17           | 9.95                   | 64.40               | 1.615       |
| $\bar{x}$              | 4.19     | 9.98     | 41.80                   | 121.1          | 66.36               | 7.64                   | 12.45           | 10.27                  | 63.70               | 1.564       |
| S                      | 0.010    | 0.006    | 0.103                   | 1.724          | 0.818               | 0.208                  | 0.347           | 0.284                  | 0.640               | 0.044       |
| 2Pxy 1                 | 4.03     | 10.25    | 41.31                   | 110.2          | 63.55               | 6.66                   | 11.28           | 10.09                  | 60.32               | 1.594       |
| 2Pxy 2                 | 3.98     | 10.27    | 40.87                   | 112.4          | 66.36               | 7.15                   | 12.26           | 9.53                   | 63.70               | 1.745       |
| 2Pxy 3                 | 4.02     | 10.26    | 41.25                   | 115.8          | 67.08               | 7.61                   | 12.93           | 9.54                   | 64.47               | 1.706       |
| $\bar{x}$              | 4.01     | 10.26    | 41.14                   | 112.8          | 65.66               | 7.14                   | 12.16           | 9.72                   | 62.83               | 1.682       |
| S                      | 0.026    | 0.010    | 0.234                   | 2.821          | 1.865               | 0.476                  | 0.830           | 0.322                  | 2.208               | 0.078       |
| 2Pz 1                  | 3.99     | 10.03    | 40.02                   | 111.3          | 66.94               | 7.12                   | 12.18           | 9.46                   | 64.24               | 1.682       |
| 2Pz 2                  | 4.06     | 10.00    | 40.60                   | 112.4          | 65.49               | 7.99                   | 13.43           | 9.73                   | 62.87               | 1.621       |
| 2Pz 3                  | 4.01     | 10.04    | 40.26                   | 112.4          | 66.87               | 6.97                   | 11.87           | 9.59                   | 64.87               | 1.731       |
| $\bar{x}$              | 4.02     | 10.02    | 40.29                   | 112.0          | 66.43               | 7.36                   | 12.49           | 9.60                   | 63.99               | 1.678       |
| S                      | 0.036    | 0.021    | 0.292                   | 0.635          | 0.818               | 0.549                  | 0.826           | 0.135                  | 1.023               | 0.055       |
| Water absorption 1 day |          |          |                         |                |                     |                        |                 |                        |                     |             |
| 2Lxy 1                 | 4.12     | 9.95     | 40.99                   | 116.9          | 66.47               | 6.67                   | 11.25           | 9.66                   | 63.92               | 1.833       |
| 2Lxy 2                 | 4.13     | 10.02    | 41.38                   | 111.3          | 62.55               | 7.12                   | 11.76           | 9.67                   | 60.02               | 1.696       |
| 2Lxy 3                 | 4.21     | 10.13    | 42.65                   | 112.4          | 60.13               | 7.66                   | 12.42           | 11.81                  | 53.52               | 1.466       |
| $\bar{x}$              | 4.15     | 10.03    | 41.67                   | 113.5          | 63.05               | 7.15                   | 11.81           | 10.38                  | 59.15               | 1.665       |
| S                      | 0.049    | 0.091    | 0.864                   | 2.967          | 3.199               | 0.497                  | 0.587           | 1.236                  | 5.254               | 0.185       |
| 2Pxy 1                 | 3.97     | 10.22    | 40.57                   | 102.3          | 61.00               | 6.72                   | 11.56           | 9.37                   | 59.66               | 1.638       |
| 2Pxy 2                 | 3.99     | 10.29    | 41.06                   | 101.2          | 59.30               | 7.17                   | 12.26           | 9.42                   | 56.67               | 1.551       |
| 2Pxy 3                 | 3.99     | 10.22    | 40.78                   | 103.4          | 61.04               | 6.88                   | 11.77           | 9.51                   | 58.38               | 1.528       |
| $\bar{x}$              | 3.98     | 10.24    | 40.80                   | 102.3          | 60.45               | 6.92                   | 11.86           | 9.43                   | 58.24               | 1.572       |
| S                      | 0.012    | 0.040    | 0.243                   | 1.100          | 0.993               | 0.225                  | 0.359           | 0.072                  | 1.500               | 0.058       |
| 2Pz 1                  | 4.00     | 9.99     | 39.96                   | 102.3          | 61.47               | 6.78                   | 11.57           | 9.50                   | 59.43               | 1.558       |
| 2Pz 2                  | 3.99     | 9.99     | 39.86                   | 101.2          | 61.09               | 6.60                   | 11.29           | 9.65                   | 59.06               | 1.632       |
| 2Pz 3                  | 4.02     | 9.98     | 40.12                   | 102.3          | 60.92               | 7.46                   | 12.66           | 10.29                  | 56.90               | 1.417       |



|                          |       |       |       |       |       |       |       |       |       |       |
|--------------------------|-------|-------|-------|-------|-------|-------|-------|-------|-------|-------|
| $\bar{x}$                | 4.00  | 9.99  | 39.98 | 101.9 | 61.16 | 6.95  | 11.84 | 9.81  | 58.46 | 1.536 |
| S                        | 0.015 | 0.006 | 0.131 | 0.635 | 0.282 | 0.452 | 0.724 | 0.418 | 1.366 | 0.109 |
| Water absorption 4 days  |       |       |       |       |       |       |       |       |       |       |
| 2Lxy 1                   | 4.19  | 10.05 | 42.11 | 114.7 | 62.41 | 7.75  | 12.63 | 9.90  | 60.59 | 1.473 |
| 2Lxy 2                   | 4.20  | 10.09 | 42.38 | 112.4 | 60.65 | 8.42  | 13.68 | 9.99  | 58.22 | 1.450 |
| 2Lxy 3                   | 4.23  | 10.14 | 42.89 | 116.9 | 62.53 | 7.43  | 12.04 | 10.67 | 59.54 | 1.512 |
| $\bar{x}$                | 4.21  | 10.09 | 42.46 | 114.7 | 61.86 | 7.86  | 12.78 | 10.19 | 59.45 | 1.478 |
| S                        | 0.021 | 0.045 | 0.398 | 2.250 | 1.052 | 0.505 | 0.831 | 0.421 | 1.188 | 0.031 |
| 2Pxy 1                   | 4.01  | 10.26 | 41.14 | 102.3 | 59.56 | 7.34  | 12.49 | 9.53  | 56.94 | 1.413 |
| 2Pxy 2                   | 4.01  | 10.27 | 41.18 | 100.1 | 58.19 | 7.00  | 11.92 | 9.66  | 56.21 | 1.362 |
| 2Pxy 3                   | 4.00  | 10.28 | 41.12 | 103.4 | 60.38 | 7.54  | 12.86 | 9.46  | 58.42 | 1.426 |
| $\bar{x}$                | 4.01  | 10.27 | 41.15 | 101.9 | 59.38 | 7.29  | 12.42 | 9.55  | 57.19 | 1.400 |
| S                        | 0.006 | 0.010 | 0.032 | 1.680 | 1.106 | 0.272 | 0.474 | 0.105 | 1.126 | 0.034 |
| 2Pz 1                    | 4.04  | 10.04 | 40.56 | 102.3 | 59.96 | 6.94  | 11.72 | 9.60  | 57.97 | 1.523 |
| 2Pz 2                    | 4.07  | 10.07 | 40.98 | 103.4 | 59.54 | 7.06  | 11.84 | 11.41 | 53.72 | 1.518 |
| 2Pz 3                    | 4.06  | 10.07 | 40.88 | 102.3 | 59.19 | 7.68  | 12.92 | 9.60  | 56.59 | 1.493 |
| $\bar{x}$                | 4.06  | 10.06 | 40.81 | 102.7 | 59.56 | 7.23  | 12.16 | 10.20 | 56.09 | 1.511 |
| S                        | 0.015 | 0.017 | 0.221 | 0.635 | 0.386 | 0.401 | 0.661 | 1.048 | 2.168 | 0.016 |
| Water absorption 7 days  |       |       |       |       |       |       |       |       |       |       |
| 2Lxy 1                   | 4.19  | 10.04 | 42.07 | 114.7 | 62.47 | 7.52  | 12.25 | 10.07 | 60.02 | 1.543 |
| 2Lxy 2                   | 4.09  | 10.03 | 41.02 | 107.9 | 61.77 | 7.59  | 12.67 | 10.02 | 58.56 | 1.369 |
| 2Lxy 3                   | 4.17  | 10.02 | 41.78 | 114.7 | 63.20 | 7.46  | 12.21 | 9.86  | 61.35 | 1.433 |
| $\bar{x}$                | 4.15  | 10.03 | 41.62 | 112.4 | 62.48 | 7.52  | 12.38 | 9.98  | 59.98 | 1.448 |
| S                        | 0.053 | 0.010 | 0.540 | 3.926 | 0.715 | 0.065 | 0.255 | 0.110 | 1.396 | 0.088 |
| 2Pxy 1                   | 3.98  | 10.25 | 40.80 | 100.1 | 59.19 | 7.39  | 12.67 | 9.44  | 57.86 | 1.474 |
| 2Pxy 2                   | 3.97  | 10.28 | 40.81 | 102.3 | 60.64 | 7.03  | 12.09 | 9.47  | 58.63 | 1.516 |
| 2Pxy 3                   | 3.98  | 10.25 | 40.80 | 100.1 | 59.19 | 7.36  | 12.62 | 10.13 | 55.84 | 1.452 |
| $\bar{x}$                | 3.98  | 10.26 | 40.80 | 100.8 | 59.67 | 7.26  | 12.46 | 9.68  | 57.44 | 1.481 |
| S                        | 0.006 | 0.017 | 0.010 | 1.270 | 0.837 | 0.199 | 0.321 | 0.392 | 1.441 | 0.033 |
| 2Pz 1                    | 3.99  | 10.07 | 40.18 | 102.3 | 61.29 | 7.50  | 12.82 | 9.65  | 59.25 | 1.536 |
| 2Pz 2                    | 4.00  | 10.03 | 40.12 | 102.3 | 61.23 | 7.36  | 12.56 | 10.03 | 58.53 | 1.645 |
| 2Pz 3                    | 4.05  | 10.03 | 40.62 | 100.1 | 58.41 | 6.81  | 11.47 | 9.58  | 56.43 | 1.500 |
| $\bar{x}$                | 4.01  | 10.04 | 40.31 | 101.6 | 60.31 | 7.22  | 12.28 | 9.75  | 58.07 | 1.560 |
| S                        | 0.032 | 0.023 | 0.274 | 1.270 | 1.646 | 0.366 | 0.716 | 0.242 | 1.465 | 0.076 |
| Water absorption 14 days |       |       |       |       |       |       |       |       |       |       |
| 2Lxy 1                   | 4.24  | 9.99  | 42.36 | 109.1 | 58.29 | 7.53  | 12.12 | 10.87 | 54.09 | 1.545 |
| 2Lxy 2                   | 4.19  | 10.07 | 42.19 | 110.2 | 59.84 | 7.48  | 12.19 | 10.76 | 56.80 | 1.265 |
| 2Lxy 3                   | 4.13  | 10.06 | 41.55 | 104.6 | 58.52 | 7.49  | 12.39 | 10.25 | 56.00 | 1.333 |
| $\bar{x}$                | 4.19  | 10.04 | 42.03 | 108.0 | 58.88 | 7.50  | 12.23 | 10.63 | 55.63 | 1.381 |
| S                        | 0.055 | 0.044 | 0.428 | 2.967 | 0.836 | 0.024 | 0.140 | 0.331 | 1.392 | 0.146 |
| 2Pxy 1                   | 4.00  | 10.29 | 41.16 | 95.6  | 55.74 | 7.33  | 12.51 | 10.13 | 52.45 | 1.424 |
| 2Pxy 2                   | 3.96  | 10.26 | 40.63 | 94.4  | 56.36 | 7.16  | 12.34 | 10.10 | 52.33 | 1.392 |
| 2Pxy 3                   | 4.00  | 10.23 | 40.92 | 93.3  | 54.75 | 7.21  | 12.30 | 9.94  | 52.11 | 1.383 |
| $\bar{x}$                | 3.99  | 10.26 | 40.90 | 94.5  | 55.62 | 7.23  | 12.38 | 10.06 | 52.30 | 1.400 |
| S                        | 0.023 | 0.030 | 0.266 | 1.125 | 0.812 | 0.089 | 0.112 | 0.103 | 0.172 | 0.022 |
| 2Pz 1                    | 4.08  | 10.11 | 41.25 | 96.7  | 55.16 | 7.45  | 12.47 | 10.32 | 51.97 | 1.348 |
| 2Pz 2                    | 4.05  | 10.05 | 40.70 | 93.3  | 54.36 | 7.49  | 12.63 | 10.11 | 51.74 | 1.391 |
| 2Pz 3                    | 4.07  | 10.07 | 40.98 | 96.7  | 55.65 | 7.82  | 13.12 | 10.21 | 52.43 | 1.453 |
| $\bar{x}$                | 4.07  | 10.08 | 40.98 | 95.6  | 55.06 | 7.59  | 12.74 | 10.21 | 52.05 | 1.397 |
| S                        | 0.015 | 0.031 | 0.273 | 1.934 | 0.651 | 0.203 | 0.339 | 0.105 | 0.351 | 0.053 |
| Water absorption 28 days |       |       |       |       |       |       |       |       |       |       |
| 2Lxy 1                   | 4.21  | 10.04 | 42.27 | 104.6 | 56.43 | 7.54  | 12.22 | 10.50 | 54.00 | 1.238 |

|           |       |       |       |       |       |       |       |       |       |       |
|-----------|-------|-------|-------|-------|-------|-------|-------|-------|-------|-------|
| 2Lxy 2    | 4.23  | 10.01 | 42.34 | 101.3 | 54.27 | 8.29  | 13.38 | 12.76 | 46.42 | 1.169 |
| 2Lxy 3    | 4.22  | 10.06 | 42.45 | 103.5 | 55.46 | 7.80  | 12.62 | 10.33 | 53.05 | 1.336 |
| $\bar{x}$ | 4.22  | 10.04 | 42.35 | 103.1 | 55.39 | 7.88  | 12.74 | 11.20 | 51.16 | 1.248 |
| S         | 0.010 | 0.025 | 0.093 | 1.680 | 1.082 | 0.383 | 0.589 | 1.357 | 4.129 | 0.084 |
| 2Pxy 1    | 4.02  | 10.26 | 41.25 | 94.5  | 54.71 | 7.37  | 12.52 | 9.55  | 52.75 | 1.291 |
| 2Pxy 2    | 3.98  | 10.25 | 40.80 | 90.0  | 53.21 | 7.40  | 12.69 | 9.52  | 50.55 | 1.226 |
| 2Pxy 3    | 4.00  | 10.27 | 41.08 | 87.8  | 51.27 | 8.20  | 14.00 | 9.61  | 49.28 | 1.203 |
| $\bar{x}$ | 4.00  | 10.26 | 41.04 | 90.8  | 53.06 | 7.66  | 13.07 | 9.56  | 50.86 | 1.240 |
| S         | 0.020 | 0.010 | 0.228 | 3.437 | 1.725 | 0.471 | 0.810 | 0.048 | 1.756 | 0.046 |
| 2Pz 1     | 4.07  | 10.09 | 41.07 | 93.3  | 53.62 | 8.14  | 13.65 | 10.84 | 49.74 | 1.282 |
| 2Pz 2     | 4.06  | 10.06 | 40.84 | 87.8  | 50.80 | 7.28  | 12.23 | 9.63  | 48.20 | 1.309 |
| 2Pz 3     | 4.02  | 10.04 | 40.36 | 88.8  | 52.57 | 7.51  | 12.76 | 10.56 | 48.58 | 1.222 |
| $\bar{x}$ | 4.05  | 10.06 | 40.76 | 90.0  | 52.33 | 7.64  | 12.88 | 10.34 | 48.84 | 1.271 |
| S         | 0.026 | 0.025 | 0.361 | 2.967 | 1.425 | 0.447 | 0.718 | 0.631 | 0.802 | 0.045 |

**Table S7.** Flexural properties of mixed material.

| No.                         | $h$ , mm | $b$ , mm | $A_0$ , mm <sup>2</sup> | $F_{\max}$ , N | $\sigma_m$ , MPa | $\varepsilon_{fm}$ , % | $S_{\max}$ , mm | $\varepsilon_{fp}$ , % | $\sigma_{fp}$ , MPa | $E_f$ , GPa |
|-----------------------------|----------|----------|-------------------------|----------------|------------------|------------------------|-----------------|------------------------|---------------------|-------------|
| Before exposure             |          |          |                         |                |                  |                        |                 |                        |                     |             |
| M2Lxy 1                     | 4.16     | 10.05    | 41.81                   | 127.1          | 70.16            | 7.38                   | 12.11           | 12.87                  | 60.83               | 1.463       |
| M2Lxy 2                     | 4.17     | 10.10    | 42.12                   | 128.2          | 70.08            | 8.05                   | 13.19           | 13.13                  | 62.09               | 1.300       |
| M2Lxy 3                     | 4.14     | 10.01    | 41.44                   | 124.8          | 69.86            | 7.62                   | 12.57           | 13.89                  | 59.79               | 1.538       |
| $\bar{x}$                   | 4.17     | 10.00    | 41.73                   | 118.0          | 65.08            | 7.35                   | 12.03           | 11.92                  | 56.00               | 1.527       |
| S                           | 0.025    | 0.026    | 0.146                   | 1.963          | 0.595            | 0.341                  | 0.500           | 3.444                  | 12.505              | 0.050       |
| M2Pxy 1                     | 3.97     | 10.28    | 40.81                   | 105.7          | 62.63            | 7.05                   | 12.13           | 9.43                   | 59.96               | 1.541       |
| M2Pxy 2                     | 4.00     | 10.25    | 41.00                   | 110.2          | 64.51            | 7.64                   | 13.05           | 9.87                   | 61.23               | 1.690       |
| M2Pxy 3                     | 4.01     | 10.25    | 41.10                   | 107.9          | 62.88            | 8.12                   | 13.83           | 9.99                   | 58.94               | 1.567       |
| $\bar{x}$                   | 3.99     | 10.26    | 40.97                   | 107.9          | 63.34            | 7.61                   | 13.00           | 9.76                   | 60.04               | 1.599       |
| S                           | 0.021    | 0.017    | 0.148                   | 2.250          | 1.021            | 0.535                  | 0.851           | 0.294                  | 1.147               | 0.080       |
| M2Pz 1                      | 4.00     | 9.98     | 39.92                   | 104.6          | 62.89            | 7.44                   | 12.69           | 9.93                   | 56.25               | 1.629       |
| M2Pz 2                      | 4.02     | 10.00    | 40.20                   | 103.4          | 61.45            | 7.15                   | 12.14           | 10.40                  | 56.01               | 1.569       |
| M2Pz 3                      | 4.05     | 10.04    | 40.66                   | 105.7          | 61.62            | 7.31                   | 12.32           | 14.63                  | 47.19               | 1.619       |
| $\bar{x}$                   | 4.02     | 10.01    | 40.26                   | 104.6          | 61.99            | 7.30                   | 12.38           | 11.65                  | 53.15               | 1.606       |
| S                           | 0.025    | 0.031    | 0.375                   | 1.150          | 0.787            | 0.144                  | 0.280           | 2.587                  | 5.163               | 0.032       |
| Ageing in UV chamber 1000 h |          |          |                         |                |                  |                        |                 |                        |                     |             |
| M2Lxy 1                     | 4.16     | 10.07    | 41.89                   | 75.3           | 41.51            | 2.44                   | 4.01            | 2.71                   | 41.25               | 1.629       |
| M2Lxy 2                     | 4.17     | 10.15    | 42.33                   | 129.3          | 70.33            | 7.21                   | 11.80           | 12.14                  | 62.39               | 1.639       |
| M2Lxy 3                     | 4.15     | 10.05    | 41.71                   | 131.6          | 72.96            | 7.59                   | 12.49           | 12.16                  | 66.72               | 1.696       |
| $\bar{x}$                   | 4.16     | 10.09    | 41.97                   | 112.1          | 61.60            | 5.75                   | 9.43            | 9.00                   | 56.79               | 1.655       |
| S                           | 0.010    | 0.053    | 0.317                   | 31.833         | 17.448           | 2.867                  | 4.708           | 5.449                  | 13.628              | 0.036       |
| M2Pxy 1                     | 4.00     | 10.15    | 40.60                   | 125.9          | 74.45            | 7.61                   | 12.98           | 12.16                  | 65.79               | 1.689       |
| M2Pxy 2                     | 3.99     | 10.12    | 40.38                   | 119.3          | 71.06            | 7.15                   | 12.23           | 13.12                  | 58.30               | 1.720       |
| M2Pxy 3                     | 4.04     | 10.16    | 41.05                   | 129.4          | 74.88            | 7.07                   | 11.94           | 13.13                  | 63.83               | 1.705       |
| $\bar{x}$                   | 4.01     | 10.14    | 40.68                   | 124.9          | 73.46            | 7.27                   | 12.38           | 12.80                  | 62.64               | 1.705       |
| S                           | 0.026    | 0.021    | 0.340                   | 5.129          | 2.092            | 0.290                  | 0.537           | 0.557                  | 3.884               | 0.016       |
| M2Pz 1                      | 4.05     | 10.08    | 40.82                   | 106.8          | 62.04            | 5.58                   | 9.40            | 7.14                   | 60.00               | 1.672       |
| M2Pz 2                      | 4.07     | 10.08    | 41.03                   | 118.1          | 67.90            | 7.30                   | 12.24           | 8.50                   | 63.75               | 1.674       |
| M2Pz 3                      | 4.00     | 9.99     | 39.96                   | 117.0          | 70.27            | 7.08                   | 12.09           | 9.52                   | 59.98               | 1.682       |
| $\bar{x}$                   | 4.04     | 10.05    | 40.60                   | 114.0          | 66.74            | 6.65                   | 11.25           | 8.39                   | 61.24               | 1.676       |
| S                           | 0.036    | 0.052    | 0.566                   | 6.231          | 4.237            | 0.936                  | 1.595           | 1.192                  | 2.171               | 0.005       |

| Natural ageing           |       |       |       |       |       |       |       |       |       |       |
|--------------------------|-------|-------|-------|-------|-------|-------|-------|-------|-------|-------|
| M2Lxy 1                  | 4.18  | 10.08 | 42.13 | 124.8 | 68.05 | 7.73  | 12.63 | 14.07 | 55.79 | 1.416 |
| M2Lxy 2                  | 4.12  | 10.05 | 41.41 | 125.1 | 68.12 | 7.69  | 12.78 | 13.87 | 55.47 | 1.400 |
| M2Lxy 3                  | 4.20  | 10.01 | 42.04 | 124.3 | 68.34 | 7.34  | 12.03 | 13.98 | 55.12 | 1.398 |
| $\bar{x}$                | 4.17  | 10.05 | 41.86 | 124.7 | 68.17 | 7.59  | 12.48 | 13.97 | 55.46 | 1.405 |
| S                        | 0.042 | 0.035 | 0.397 | 0.404 | 0.151 | 0.215 | 0.397 | 0.100 | 0.335 | 0.010 |
| M2Pxy 1                  | 3.99  | 10.11 | 40.34 | 118.1 | 70.44 | 6.82  | 11.66 | 13.25 | 58.36 | 0.841 |
| M2Pxy 2                  | 4.01  | 10.01 | 40.14 | 117.6 | 70.45 | 6.54  | 11.01 | 13.01 | 58.26 | 0.812 |
| M2Pxy 3                  | 4.00  | 10.14 | 40.56 | 117.9 | 70.23 | 6.24  | 11.12 | 13.58 | 58.01 | 0.856 |
| $\bar{x}$                | 4.00  | 10.09 | 40.35 | 117.9 | 70.37 | 6.53  | 11.26 | 13.28 | 58.21 | 0.836 |
| S                        | 0.010 | 0.068 | 0.210 | 0.273 | 0.124 | 0.289 | 0.348 | 0.286 | 0.180 | 0.022 |
| M2Pz 1                   | 4.02  | 10.00 | 40.20 | 112.5 | 66.83 | 6.67  | 11.33 | 10.53 | 60.11 | 1.252 |
| M2Pz 2                   | 4.03  | 10.01 | 40.34 | 112.8 | 66.14 | 6.54  | 11.12 | 10.12 | 60.14 | 1.244 |
| M2Pz 3                   | 4.01  | 10.01 | 40.14 | 111.8 | 66.25 | 6.23  | 11.42 | 10.29 | 59.87 | 1.269 |
| $\bar{x}$                | 4.02  | 10.01 | 40.23 | 112.4 | 66.41 | 6.48  | 11.29 | 10.31 | 60.04 | 1.255 |
| S                        | 0.010 | 0.006 | 0.103 | 0.513 | 0.371 | 0.228 | 0.154 | 0.206 | 0.148 | 0.013 |
| Water absorption 28 days |       |       |       |       |       |       |       |       |       |       |
| M2Lxy 1                  | 4.12  | 9.98  | 41.12 | 106.8 | 60.52 | 8.56  | 14.18 | 12.57 | 53.52 | 1.333 |
| M2Lxy 2                  | 4.19  | 9.99  | 41.86 | 110.2 | 60.32 | 8.10  | 13.20 | 12.49 | 55.39 | 1.257 |
| M2Lxy 3                  | 4.20  | 9.99  | 41.96 | 107.9 | 58.81 | 7.80  | 12.67 | 12.65 | 53.31 | 1.367 |
| $\bar{x}$                | 4.17  | 9.99  | 41.64 | 108.3 | 59.88 | 8.15  | 13.35 | 12.57 | 54.07 | 1.319 |
| S                        | 0.044 | 0.006 | 0.459 | 1.735 | 0.935 | 0.383 | 0.766 | 0.080 | 1.145 | 0.056 |
| M2Pxy 1                  | 3.99  | 10.18 | 40.62 | 95.6  | 56.63 | 7.21  | 12.33 | 12.60 | 49.28 | 1.293 |
| M2Pxy 2                  | 4.01  | 10.15 | 40.70 | 100.1 | 58.88 | 8.01  | 13.63 | 12.72 | 51.58 | 1.397 |
| M2Pxy 3                  | 4.02  | 10.16 | 40.84 | 97.8  | 57.21 | 8.13  | 13.81 | 12.44 | 51.28 | 1.344 |
| $\bar{x}$                | 4.01  | 10.16 | 40.72 | 97.8  | 57.57 | 7.78  | 13.26 | 12.59 | 50.71 | 1.345 |
| S                        | 0.015 | 0.015 | 0.114 | 2.250 | 1.168 | 0.502 | 0.808 | 0.140 | 1.250 | 0.052 |
| M2Pz 1                   | 4.04  | 10.04 | 40.56 | 95.6  | 56.01 | 8.10  | 13.69 | 12.79 | 49.42 | 1.281 |
| M2Pz 2                   | 3.99  | 9.99  | 39.86 | 91.1  | 54.99 | 7.49  | 12.81 | 12.32 | 48.86 | 1.353 |
| M2Pz 3                   | 4.05  | 10.00 | 40.50 | 91.1  | 53.32 | 7.72  | 13.01 | 12.39 | 46.73 | 1.297 |
| $\bar{x}$                | 4.03  | 10.01 | 40.31 | 92.6  | 54.77 | 7.77  | 13.17 | 12.50 | 48.34 | 1.310 |
| S                        | 0.032 | 0.026 | 0.388 | 2.598 | 1.358 | 0.310 | 0.461 | 0.254 | 1.419 | 0.038 |

**Table S8.** Flexural properties of 100% recycled material.

| No.             | $h$ , mm | $b$ , mm | $A_0$ , mm <sup>2</sup> | $F_{max}$ , N | $\sigma_{fm}$ , MPa | $\varepsilon_{fm}$ , % | $S_{max}$ , mm | $\varepsilon_{fp}$ , % | $\sigma_{fp}$ , MPa | $E_f$ , GPa |
|-----------------|----------|----------|-------------------------|---------------|---------------------|------------------------|----------------|------------------------|---------------------|-------------|
| Before exposure |          |          |                         |               |                     |                        |                |                        |                     |             |
| R2Lxy 1         | 4.17     | 10.03    | 41.83                   | 116.9         | 64.37               | 8.44                   | 13.81          | 12.87                  | 58.81               | 1.416       |
| R2Lxy 2         | 4.18     | 10.20    | 42.64                   | 118.1         | 63.62               | 8.46                   | 13.81          | 12.70                  | 57.56               | 1.319       |
| R2Lxy 3         | 4.13     | 10.07    | 41.59                   | 114.7         | 64.11               | 7.85                   | 12.98          | 12.70                  | 56.56               | 1.243       |
| $\bar{x}$       | 4.16     | 10.10    | 42.02                   | 116.6         | 64.03               | 8.25                   | 13.53          | 12.76                  | 57.64               | 1.326       |
| S               | 0.026    | 0.089    | 0.549                   | 1.724         | 0.381               | 0.343                  | 0.479          | 0.098                  | 1.127               | 0.087       |
| R2Pxy 1         | 3.88     | 10.14    | 39.34                   | 88.8          | 55.88               | 7.50                   | 13.20          | 12.82                  | 46.66               | 1.112       |
| R2Pxy 2         | 3.96     | 10.1     | 40.00                   | 104.6         | 63.40               | 7.24                   | 12.47          | 13.65                  | 49.76               | 1.455       |
| R2Pxy 3         | 4.00     | 10.03    | 40.12                   | 106.8         | 63.92               | 7.49                   | 12.78          | 12.73                  | 53.81               | 1.466       |
| $\bar{x}$       | 3.95     | 10.09    | 39.82                   | 100.1         | 61.07               | 7.41                   | 12.82          | 13.07                  | 50.08               | 1.344       |
| S               | 0.061    | 0.056    | 0.417                   | 9.790         | 4.499               | 0.149                  | 0.366          | 0.507                  | 3.586               | 0.201       |
| R2Pz 1          | 4.02     | 9.98     | 40.12                   | 106.9         | 63.63               | 7.08                   | 12.03          | 8.60                   | 61.12               | 1.449       |
| R2Pz 2          | 4.08     | 10.01    | 40.84                   | 119.3         | 68.70               | 7.68                   | 12.86          | 12.00                  | 61.11               | 1.646       |
| R2Pz 3          | 4.02     | 9.97     | 40.08                   | 108.0         | 64.35               | 6.97                   | 11.83          | 8.55                   | 61.23               | 1.398       |

|                             |       |       |       |        |       |       |       |       |       |       |
|-----------------------------|-------|-------|-------|--------|-------|-------|-------|-------|-------|-------|
| $\bar{x}$                   | 4.04  | 9.99  | 40.35 | 111.4  | 65.56 | 7.24  | 12.24 | 9.72  | 61.15 | 1.498 |
| S                           | 0.035 | 0.021 | 0.428 | 6.864  | 2.743 | 0.386 | 0.546 | 1.976 | 0.067 | 0.131 |
| Ageing in UV chamber 1000 h |       |       |       |        |       |       |       |       |       |       |
| R2Lxy 1                     | 4.02  | 10.26 | 41.25 | 111.3  | 64.47 | 7.43  | 12.62 | 13.22 | 52.75 | 1.430 |
| R2Lxy 2                     | 4.22  | 10.12 | 42.71 | 124.8  | 66.51 | 8.67  | 14.02 | 13.46 | 56.92 | 1.252 |
| R2Lxy 3                     | 4.19  | 10.18 | 42.65 | 123.8  | 66.47 | 8.00  | 13.03 | 13.06 | 60.43 | 1.375 |
| $\bar{x}$                   | 4.14  | 10.19 | 42.20 | 120.0  | 65.82 | 8.03  | 13.22 | 13.25 | 56.70 | 1.352 |
| S                           | 0.108 | 0.070 | 0.829 | 7.522  | 1.166 | 0.619 | 0.720 | 0.201 | 3.845 | 0.091 |
| R2Pxy 1                     | 4.02  | 10.12 | 40.68 | 108.0  | 63.40 | 7.54  | 12.79 | 12.86 | 55.47 | 1.421 |
| R2Pxy 2                     | 4.01  | 10.12 | 40.58 | 109.1  | 64.36 | 7.43  | 12.65 | 13.63 | 55.75 | 0.744 |
| R2Pxy 3                     | 3.98  | 10.13 | 40.32 | 99.0   | 59.23 | 7.18  | 12.31 | 12.97 | 49.81 | 0.537 |
| $\bar{x}$                   | 4.00  | 10.12 | 40.53 | 105.4  | 62.33 | 7.38  | 12.58 | 13.15 | 53.68 | 0.901 |
| S                           | 0.021 | 0.006 | 0.188 | 5.541  | 2.727 | 0.183 | 0.247 | 0.416 | 3.352 | 0.462 |
| R2Pz 1                      | 4.05  | 9.96  | 40.34 | 108.0  | 63.46 | 6.64  | 11.19 | 8.33  | 49.01 | 0.691 |
| R2Pz 2                      | 4.02  | 9.96  | 40.04 | 82.1   | 48.97 | 3.96  | 6.72  | 6.84  | 45.00 | 1.254 |
| R2Pz 3                      | 4.00  | 9.95  | 39.80 | 102.3  | 61.72 | 6.40  | 10.92 | 7.93  | 52.50 | 0.525 |
| $\bar{x}$                   | 4.02  | 9.96  | 40.06 | 97.5   | 58.05 | 5.67  | 9.61  | 7.70  | 48.84 | 0.823 |
| S                           | 0.025 | 0.006 | 0.270 | 13.610 | 7.911 | 1.483 | 2.505 | 0.772 | 3.753 | 0.382 |
| Natural ageing              |       |       |       |        |       |       |       |       |       |       |
| R2Lxy 1                     | 4.17  | 10.10 | 42.12 | 122.6  | 67.01 | 7.47  | 12.23 | 13.27 | 58.41 | 1.404 |
| R2Lxy 2                     | 4.20  | 10.01 | 42.04 | 122.1  | 66.98 | 7.52  | 12.01 | 13.05 | 58.42 | 1.412 |
| R2Lxy 3                     | 4.12  | 10.00 | 41.20 | 121.8  | 67.23 | 7.34  | 12.12 | 13.35 | 58.34 | 1.435 |
| $\bar{x}$                   | 4.16  | 10.04 | 41.79 | 122.2  | 67.07 | 7.44  | 12.12 | 13.22 | 58.39 | 1.417 |
| S                           | 0.040 | 0.055 | 0.509 | 0.404  | 0.137 | 0.093 | 0.110 | 0.155 | 0.044 | 0.016 |
| R2Pxy 1                     | 3.89  | 10.13 | 39.41 | 106.8  | 66.92 | 7.49  | 13.14 | 12.92 | 57.05 | 0.767 |
| R2Pxy 2                     | 4.01  | 10.01 | 40.14 | 106.1  | 66.54 | 7.12  | 13.01 | 12.54 | 57.10 | 0.777 |
| R2Pxy 3                     | 3.99  | 10.09 | 40.26 | 107.2  | 66.12 | 7.25  | 13.89 | 13.01 | 56.98 | 0.745 |
| $\bar{x}$                   | 3.96  | 10.08 | 39.93 | 106.7  | 66.53 | 7.29  | 13.35 | 12.82 | 57.04 | 0.763 |
| S                           | 0.064 | 0.061 | 0.462 | 0.557  | 0.400 | 0.187 | 0.475 | 0.249 | 0.060 | 0.016 |
| R2Pz 1                      | 4.03  | 9.96  | 40.14 | 102.3  | 60.74 | 6.01  | 10.18 | 9.06  | 24.72 | 0.613 |
| R2Pz 2                      | 4.01  | 10.01 | 40.14 | 102.0  | 60.75 | 5.98  | 10.01 | 9.23  | 24.25 | 0.599 |
| R2Pz 3                      | 4.01  | 9.99  | 40.06 | 102.6  | 60.54 | 5.89  | 10.23 | 8.87  | 24.58 | 0.602 |
| $\bar{x}$                   | 4.02  | 9.99  | 40.11 | 102.3  | 60.68 | 5.96  | 10.14 | 9.05  | 24.52 | 0.605 |
| S                           | 0.012 | 0.025 | 0.046 | 0.300  | 0.118 | 0.063 | 0.115 | 0.180 | 0.241 | 0.007 |
| Water absorption 28 days    |       |       |       |        |       |       |       |       |       |       |
| R2Lxy 1                     | 4.18  | 10.12 | 42.30 | 105.7  | 57.36 | 8.31  | 13.58 | 12.55 | 51.28 | 1.146 |
| R2Lxy 2                     | 4.15  | 10.11 | 41.96 | 97.8   | 53.92 | 8.64  | 14.22 | 12.30 | 48.96 | 1.083 |
| R2Lxy 3                     | 4.24  | 10.18 | 43.16 | 101.2  | 53.06 | 9.23  | 14.86 | 12.26 | 48.94 | 1.054 |
| $\bar{x}$                   | 4.19  | 10.14 | 42.47 | 101.6  | 54.78 | 8.73  | 14.22 | 12.37 | 49.73 | 1.094 |
| S                           | 0.046 | 0.038 | 0.621 | 3.963  | 2.275 | 0.466 | 0.640 | 0.157 | 1.345 | 0.047 |
| R2Pxy 1                     | 4.00  | 10.08 | 40.32 | 85.4   | 50.86 | 7.45  | 12.71 | 12.21 | 44.82 | 1.095 |
| R2Pxy 2                     | 4.03  | 10.12 | 40.78 | 86.6   | 50.58 | 7.91  | 13.40 | 12.14 | 45.33 | 1.271 |
| R2Pxy 3                     | 4.01  | 10.08 | 40.42 | 84.3   | 49.96 | 7.98  | 13.58 | 12.21 | 44.63 | 1.079 |
| $\bar{x}$                   | 4.01  | 10.09 | 40.51 | 85.5   | 50.47 | 7.78  | 13.23 | 12.19 | 44.93 | 1.148 |
| S                           | 0.015 | 0.023 | 0.244 | 1.125  | 0.461 | 0.289 | 0.459 | 0.040 | 0.362 | 0.107 |
| R2Pz 1                      | 4.03  | 10.01 | 40.34 | 89.9   | 53.12 | 7.19  | 12.18 | 11.23 | 41.31 | 1.326 |
| R2Pz 2                      | 4.04  | 10.03 | 40.52 | 83.2   | 48.79 | 6.90  | 11.66 | 11.62 | 41.25 | 1.257 |
| R2Pz 3                      | 3.96  | 9.95  | 39.40 | 71.9   | 44.27 | 7.30  | 12.58 | 9.77  | 37.50 | 1.022 |
| $\bar{x}$                   | 4.01  | 10.00 | 40.09 | 81.7   | 48.73 | 7.13  | 12.14 | 10.87 | 40.02 | 1.202 |
| S                           | 0.044 | 0.042 | 0.601 | 9.093  | 4.425 | 0.205 | 0.461 | 0.977 | 2.183 | 0.159 |
